# Supplementary material
Source: Springer Nature journal article supplement (https://www.springermedizin.de/resource/supplementary/12889_2010_3132_MOESM1_ESM.pdf/9488236)

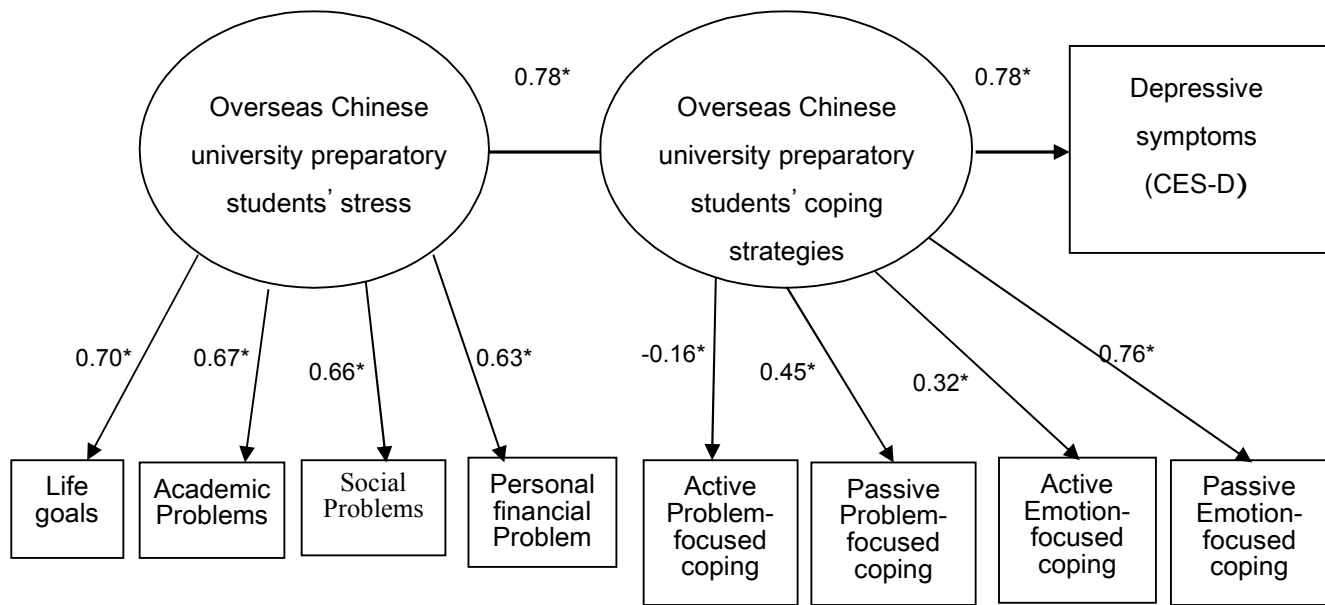

\* $p < 0.01$

Supplement: MOESM1 [file 9488236]
